# Supplementary material for: An ultra-stable reference electrode for scaled all-vanadium redox flow batteries
Source: PubMed Central journal article supplement — RSC Adv. 2022 Nov 9;12(50):32173–84. doi: 10.1039/d2ra05781f (PMC9645223; doi:10.1039/d2ra05781f), 2022-11-09
Supplement: RA-012-D2RA05781F-s001.pdf [file RA-012-D2RA05781F-s001.pdf]

## Electronic Supplementary Information (ESI)

### An Ultra-Stable Reference Electrode Development for Scaled All- Vanadium Redox Flow Batteries

Qian Huang <sup>a\*</sup>, Chaojie Song <sup>b</sup>, Alasdair Crawford <sup>c</sup>, Zhengming Jiang <sup>b</sup>, Alison Platt <sup>b</sup>, Khalid Fatih <sup>b</sup>, Christina Bock <sup>d</sup>, David Reed <sup>a</sup>

<sup>a</sup> Battery Materials & Systems Group, Pacific Northwest National Laboratory, Richland, WA 99352, USA

<sup>b</sup> Energy, Mining & Environment, National Research Council Canada, Vancouver BC V6T 1W5, Canada

<sup>c</sup> Electricity Infrastructure & Building Group, Pacific Northwest National Laboratory, Richland, WA 99352

<sup>d</sup> Energy, Mining & Environment, National Research Council Canada, Ottawa ON K1A 0R6, Canada

\* Corresponding author Email Address: [Qian.Huang@pnnl.gov](mailto:Qian.Huang@pnnl.gov)

Table S1 State-of-the-art reference electrode (RE) approaches

| R.E.                | Type (Location) | Stability | Application                                                  | Advantage                                                                   | Disadvantage                                                                                                                                                                     |
|---------------------|-----------------|-----------|--------------------------------------------------------------|-----------------------------------------------------------------------------|----------------------------------------------------------------------------------------------------------------------------------------------------------------------------------|
| Ag/AgCl             | *External       | Good      | To determine the individual overpotentials in each half-cell | Relatively stable, not influenced by the internal electrolyte environments. | <ul style="list-style-type: none"> <li>▪ <b>Potential chloride contamination.</b></li> <li>▪ <b>A large IR drop</b> due to a large distance between RE and electrode.</li> </ul> |
| Pt wire             | **Internal      | Poor      | To decouple the cathode and anode potential or impedance     | Easy to assemble                                                            | The potential of RE continued to <b>shift</b> .                                                                                                                                  |
| Carbon cloth /fiber |                 |           |                                                              |                                                                             |                                                                                                                                                                                  |
| DHE (Conventional)  |                 |           |                                                              |                                                                             |                                                                                                                                                                                  |

*\*External: inserted in the inlet or outlet tubing of the cell*

*\*\*Internal: inserted between membranes*

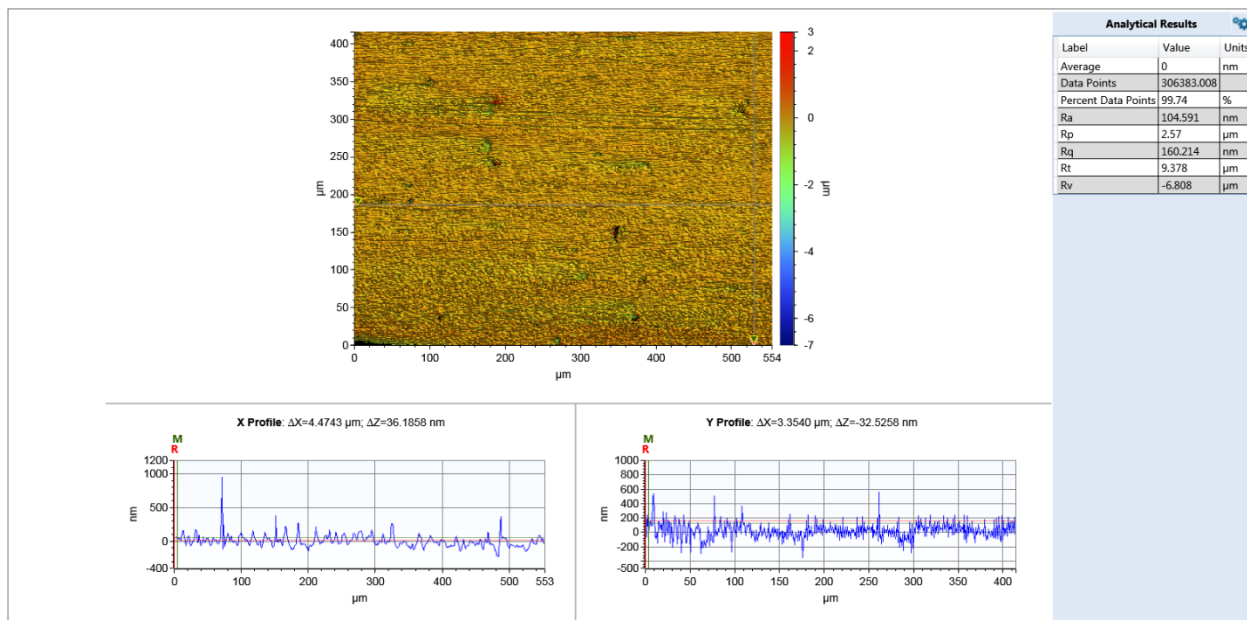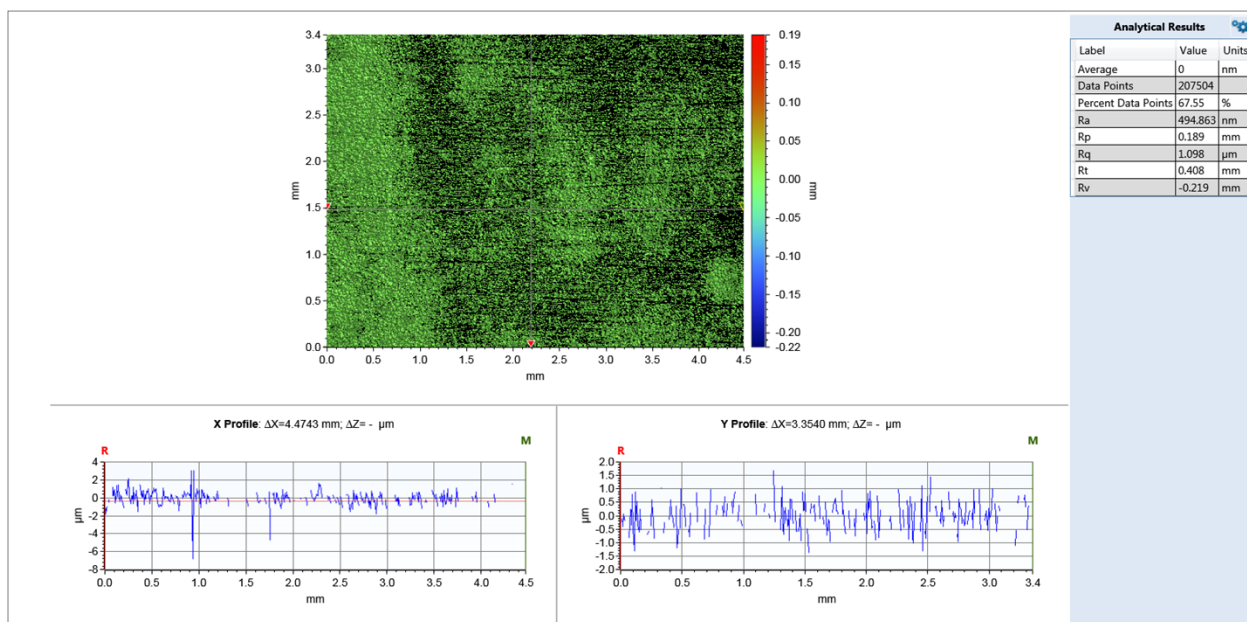

Figure S1 Surface roughness of the Pt foils measured by a profilometer: (a) Pt foil with smooth surface in *DHE<sub>Gen2</sub>*, and (b) Pt foil with rough surface in *DHE<sub>Gen3</sub>*.

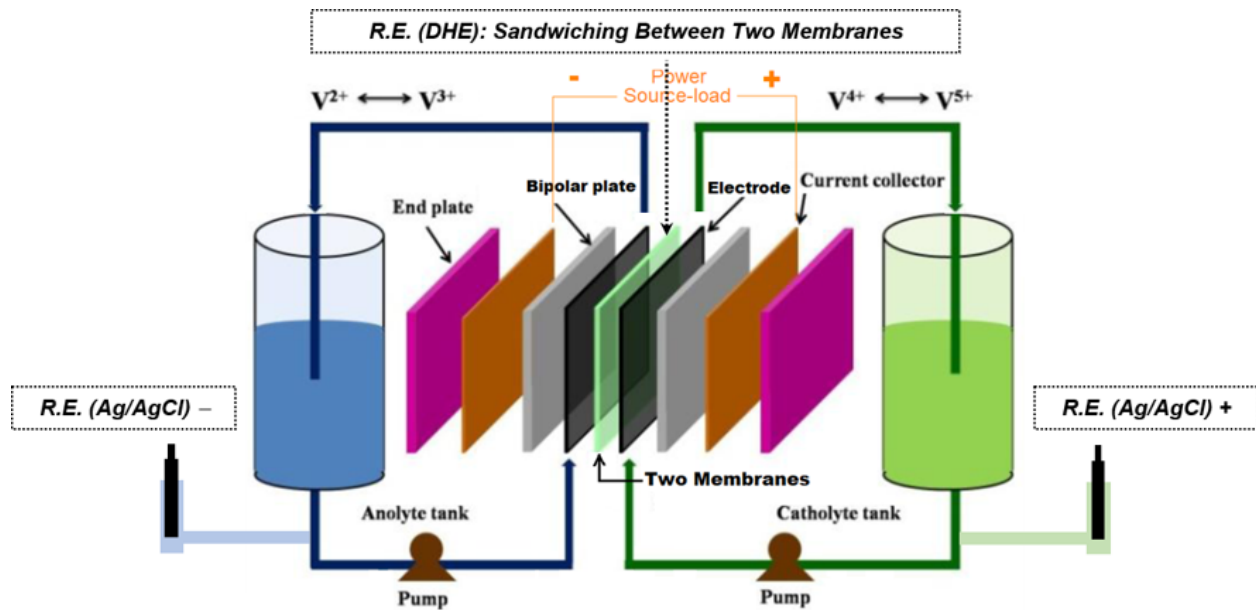

Figure S2 A scheme of an all-vanadium redox flow battery with a DHE based internal reference electrode (inserted between two membranes) and two Ag/AgCl based external reference electrodes (placed in the inlet of catholyte or anolyte respectively).

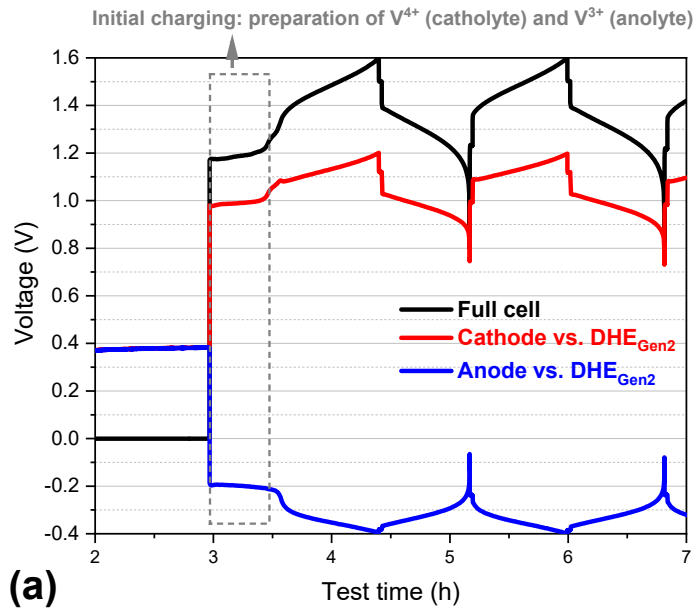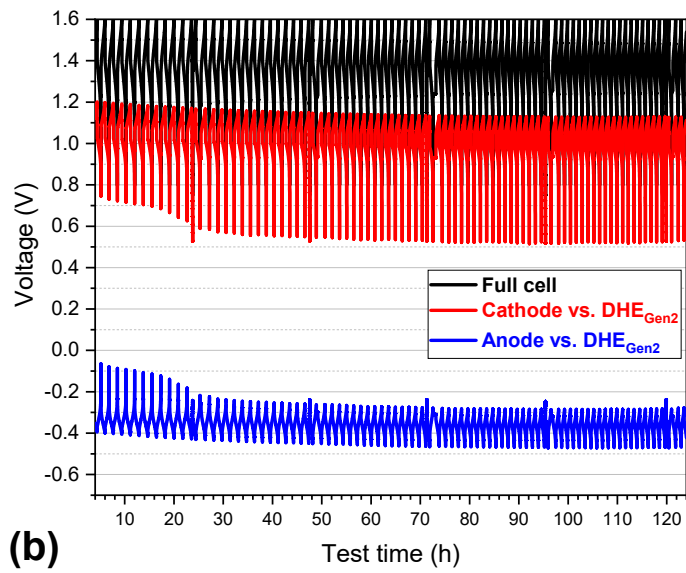

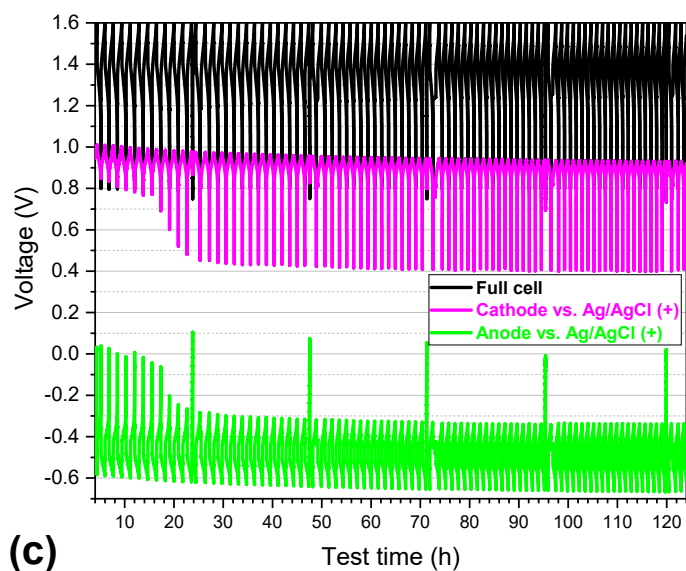

(c)

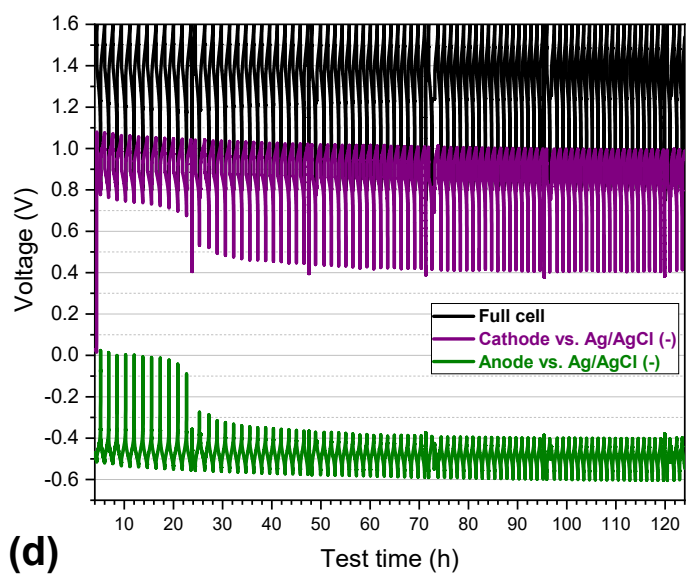

(d)

Figure S3 Voltage profiles (vs. time) with internal and external reference electrodes: individual electrode (cathode or anode) voltage vs. (a) DHE for the initial 2 cycles, (b) DHE, (c) Ag/AgCl (+) (in the catholyte inlet), and (c) Ag/AgCl (-) (in the anolyte inlet) for the initial 80 cycles.

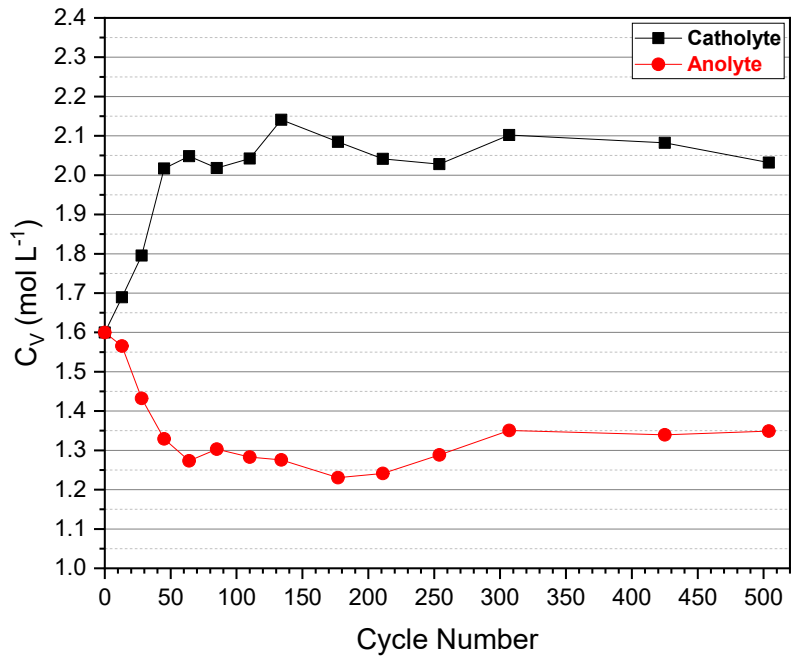

Figure S4 Total vanadium ion concentration of catholyte and anolyte as a function of cycle number, measured by inductively coupled plasma (ICP) after discharge.

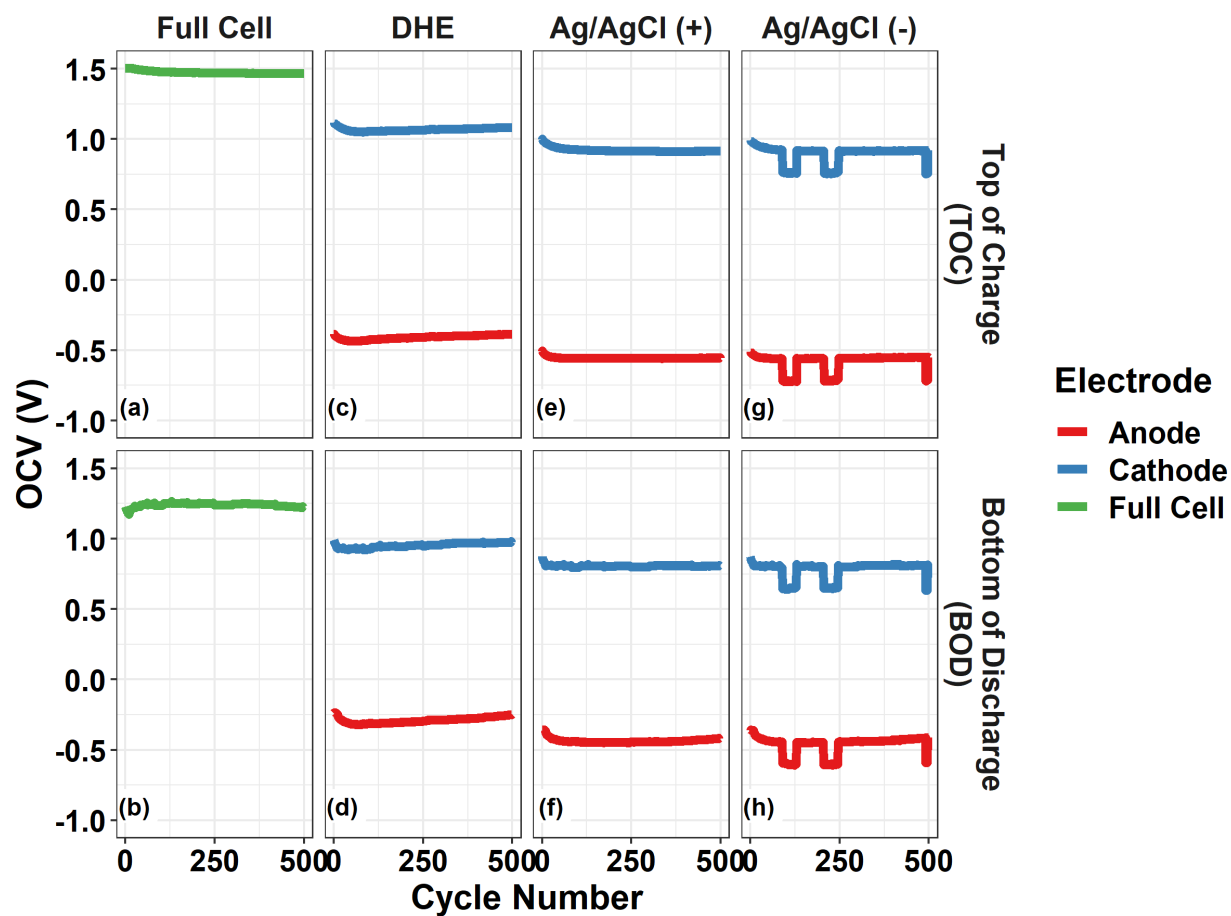

Figure S5 OCV at the top of charge (TOC) and bottom of discharge (BOD) as a function of cycle numbers for the full cell and individual electrode (cathode or anode) vs. different reference electrodes (DHE, Ag/AgCl (+) and Ag/AgCl (-)).



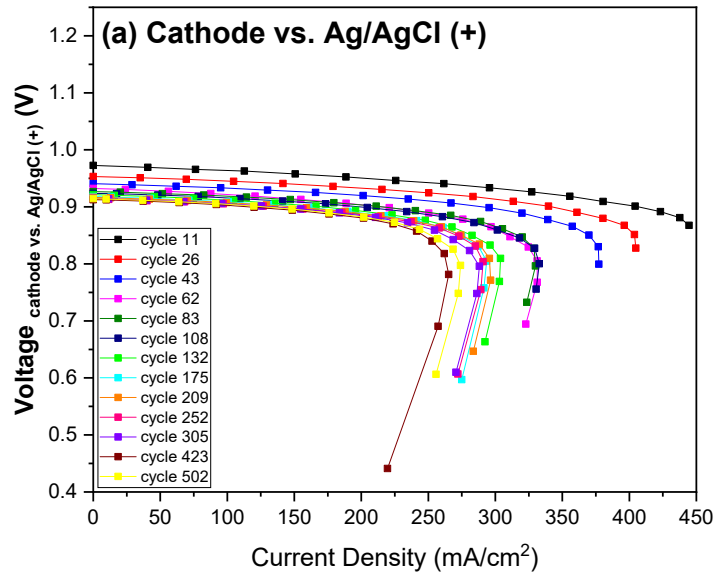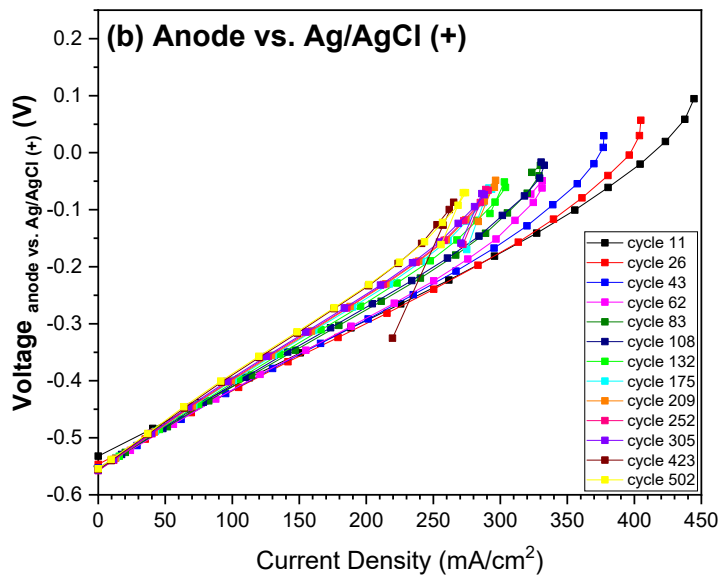

Figure S6 Polarization curves as a function of cycle numbers for (a) cathode vs. Ag/AgCl (+) and (b) anode vs. Ag/AgCl (+).
